# Supplementary material
Source: publisher site journal article supplement (https://www.dovepress.com/article/412895)
Supplement: Supplementary file 1 [file get_supplementary_file.php]

**Supplemental Digital Content 1**

Interview Guide

1. Introduction

- Introduction of the interviewer.
- Explanation of the aim of the study and the interview procedure. The interviewer will explicitly state the difference between PME and PMI, acknowledge that the therapist most likely has the experience of both, and clarify that this qualitative study is concerned with PME only.
- Signing of informed consent form.
- Answering additional questions.

II. Semi-structured interview

***Turn on the voice recorder***

*Interviewer: “Start of the interview with (participant number) on (date).”*

*Time at the start of the interview: …*

1. **Effect of Phantom Motor Execution (PME)**

- Can you tell me about your overall experience with treating PLP patients? How much experience do you have?
- How many participants have you treated with PME system?
- What were these participants` characteristics (e.g., in terms of upper/lower limb, level of amputation)?
- What was your experience of the treatment with the PME system?
- How would you describe the goal of the treatment with the PME system?
  - To what extent, has this goal been achieved for the patients you have treated?
- On what domains did you notice most effects in your patients?
  - Cluster 1: phantom limb pain, phantom limb sensations, phantom limb movements
  - Cluster 2: prosthesis use, medication *(if applicable)*
  - Cluster 3: paid work, volunteering, hobbies, sports, social contacts
  - Cluster 4: sleep, energy level, quality of life
- Have there been any unexpected changes due to the treatment with the PME system?Have you noticed any positive or negative effects?
  - Cluster 1: phantom limb pain, phantom limb sensations, phantom limb movements
  - Cluster 2: prosthesis use, medication *(if applicable)*
  - Cluster 3: paid work, volunteering, hobbies, sports, social contacts
  - Cluster 4: sleep, energy level, quality of life
- How has your perception of phantom limb pain treatment changed during the delivery of PME treatment?
- What does the treatment with the PME system mean to you?

1. **Phantom limb complaints**

- Can you describe how, in your opinion, the phantom limb complaints are affected by the PME program?
- What kind of person is likely to show improvement when treated with PME program?How would you describe the type of a participant (in terms of cluster 1, 2 or 3, etc.) that is most likely to benefit from the PME intervention? Why are these characteristics important?
  - Cluster 1: Personal characteristics: Age, gender, marital status, job, personal traits, motivation, social support;
  - Cluster 2: Phantom limb pain/sensations: Start of complaints, course of complaints throughout the day, severity of complaints, duration of complaints, type of phantom: cramping, able to move the phantom (fingers/wrist/elbow);
  - Cluster 3: Amputation: level of amputation, cause of amputation, leg or arm, year of amputation).
- How would you describe the type of a therapist that is most likely to facilitate treatment with PME intervention? Why are these characteristics important?

1. **Evaluation of PME system**

- Which parts of the PME program did you work with most (TAC test, training with virtual arm, or race game)?
- In your experience, which parts of the PME program were most effective (in affecting the phantom limb complaints)? Can you describe why you feel that way?
- Thinking about the protocol you used (1, 2, or 5 times per week), what was your experience of it? What were your preferences? Why?
- In your view, which elements of the program facilitated the execution of the treatment?
- In your view, which elements of the program impeded the execution of the treatment?
- What other external factors (outside PME program) might have facilitated or impeded the execution of the treatment? (e.g., time of day, fatigue, previous activities during the day, other factors)
- If you could change anything in the treatment with the PME system, what would it be?
  - Frequency or length of treatment sessions, various parts of the program, level of difficulty, travel time/burden, number of therapists, technical issues, transport, finance
- What other techniques/tools (if at all) did you use to facilitate treatment? (e.g., use a big screen to increase the VR experience, or guide the patients with verbal instructions, or ask the patient to think in a functional task, etc.)
- To what extent would a home-based treatment system be feasible?
  - Would it be appreciated by your patients? Why?/Why not?
  - How could it work?
- Would you recommend the treatment with the PME program to other therapists/rehabilitation centers? Why/Why not ?
  - Who would you recommend it to?

1. **Therapeutic alliance:** Therapeutic alliance refers to relationship processes that occur between a therapist and a patient during treatment.

- How would you describe the strength and quality of a therapeutic alliance between yourself as a therapist and the patients that you treated? (e.g., sense of collaboration, warmth, support between the therapist and the client, etc.)
- How did you achieve that alliance/relationship?
- If you have the experience of treating patients with both PME and PMI. How was therapeutic alliance impacted (if at all) by the type of treatment received?
- When thinking about your average participant treated with PME system, to what extent were you and your participant ready to:
- agree on and accept the goals of treatment?
- agree on tasks to achieve these goals?
- In your experience, how important was the quality of therapist-patient bonding for
- PME Treatment?
- Patient outcomes?
- Adherence to treatment?
- Treatment satisfaction?
- How would you describe the role of a therapist during the PME treatment?
- In your view, what was the most important factor in successful treatment?

1. **Other**

- Would you like to add anything to what we discussed?

*Interviewer: “End of the interview with (participant number) on (date).”*

***Turn off the voice recorder***

*Time at the end of the interview: …*

III. Closing part

Evaluation of interview, (b) Explain returning transcript for comments/corrections, (c) Thank participant for cooperation, (d) Answer additional questions
